# Supplementary material for: Exploring silver ionic liquids for reaction-based gas sensing on a quartz crystal microbalance
Source: Royal Society of Chemistry journal article supplement (doi:10.1039/c5an01404b), 2015-01-01
Supplement: c5an01404b1.pdf [file c5an01404b1.pdf]

## Supporting Information

### **Exploring Silver Ionic Liquids for Reaction-Based Gas Sensing on Quartz Crystal Microbalance†**

Hsin-Yi Li,‡ Tzu-Hsuan Hsu,‡ Chien-Yuan Chen, Ming-Chung Tseng and Yen-Ho

Chu\*

Department of Chemistry and Biochemistry, National Chung Cheng University

168 University Road, Chiayi 62102, Taiwan, ROC

‡Both authors contributed equally to this work.

\*Corresponding author. Tel + 886 5 2720411 ext. 66408; fax + 886 5 2721040; e-mail:

[cheyhc@ccu.edu.tw](mailto:cheyhc@ccu.edu.tw)

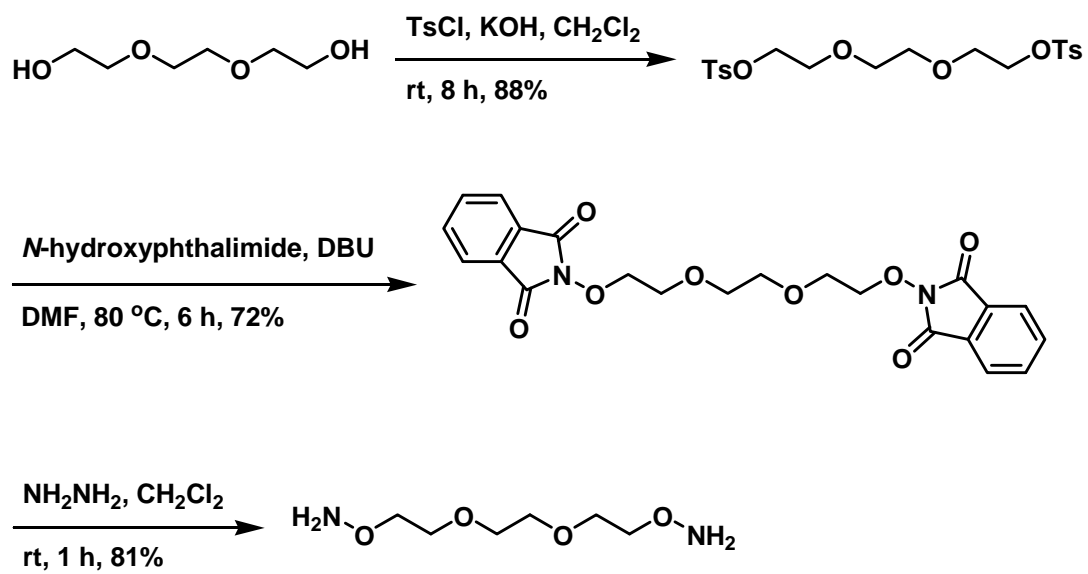

**Fig. S1** Synthesis of 1,2-bis(2-aminoxyethoxy)ethane used as the ligand for synthesizing silver ionic liquid **SIL 4**.

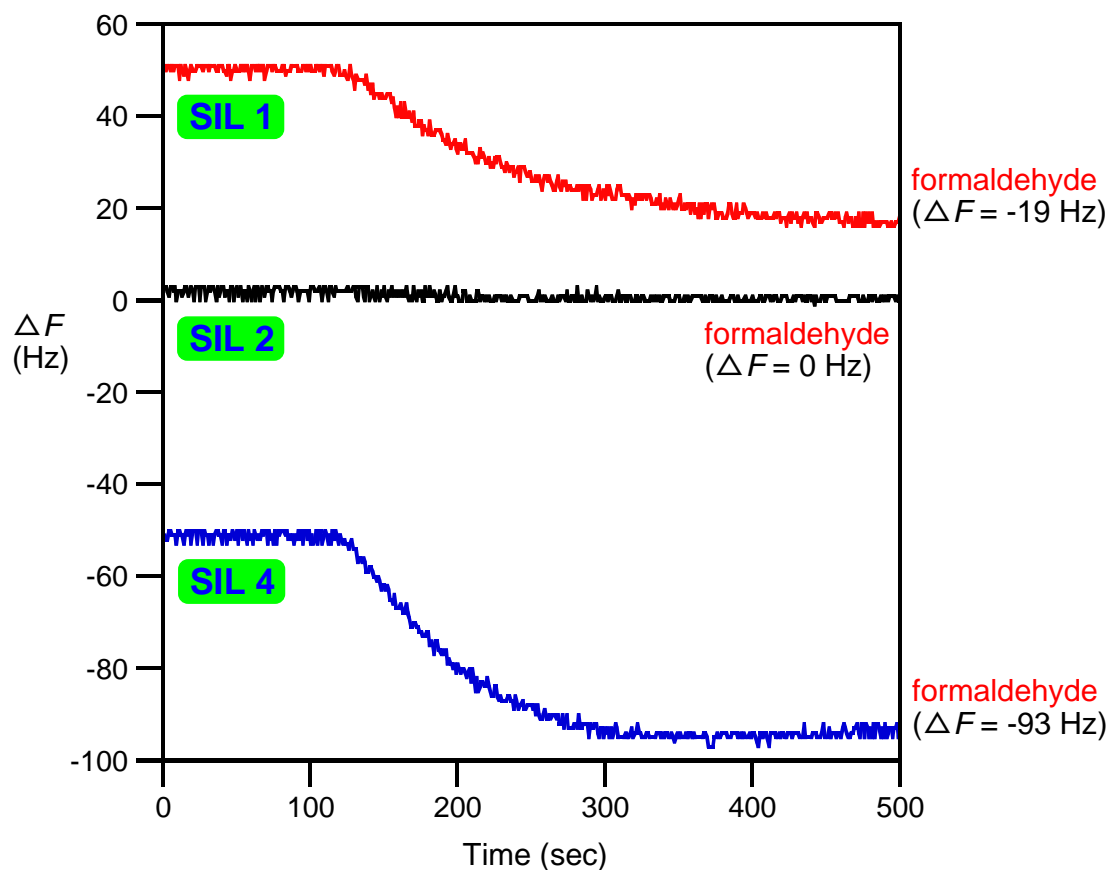

**Fig. S2** Chemoselective detection of formaldehyde gas (100 ppb) by a multi-channel QCM thin-coated with **SIL 1**, **SIL 2** and **SIL 4**. The QCM sensorgrams with **SIL 1**, **SIL 2** and **SIL 4** for formaldehyde gas were vertically shifted (50 Hz in between) for clarity. Nitrogen was used as the carrier gas with a flow rate of 3 mL/min, and gaseous samples were injected at 100 s. The resonance frequency drop,  $\Delta F$ , in Hz is the QCM response on the quartz chip surface.

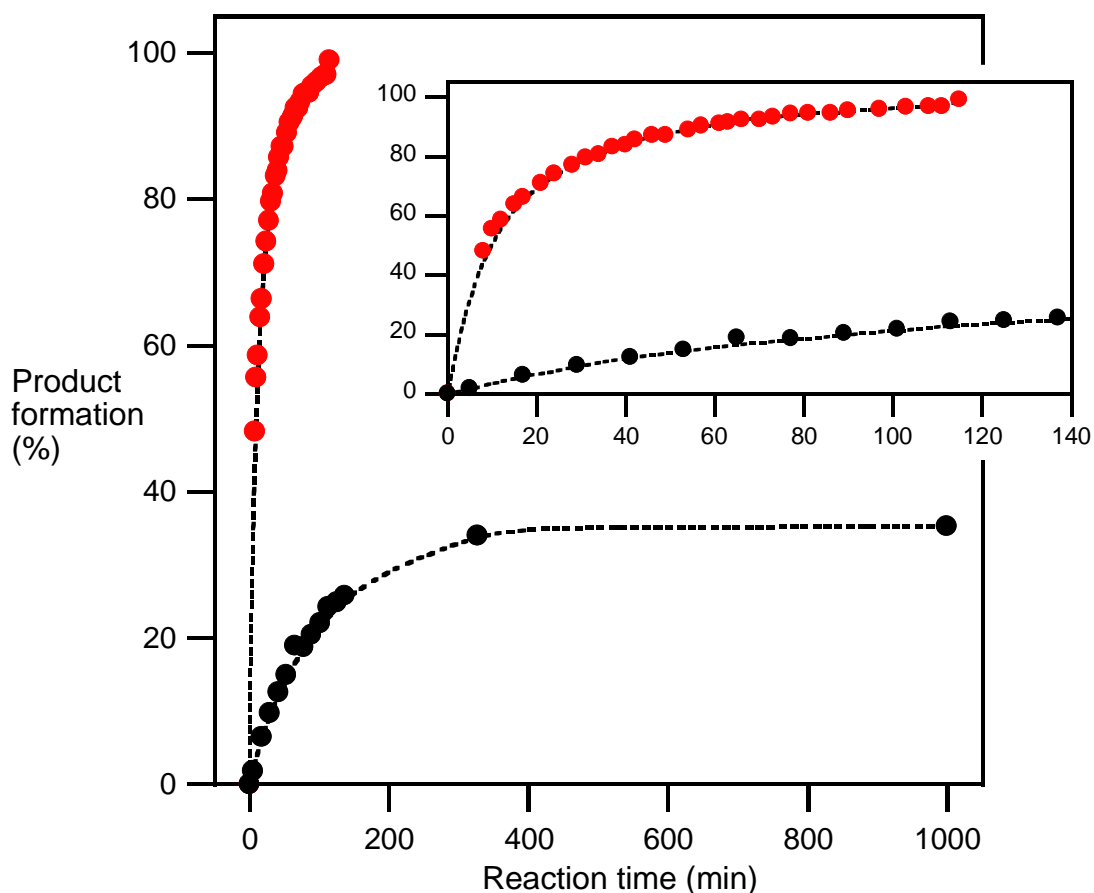

**Fig. S3** Kinetic measurements of imine forming reactions of amine ligands (0.50 M each) of **SIL 1** (1,2-bis(2-aminoethoxy)ethane, black circle ●) and **SIL 4** (1,2-bis(2-aminooxyethoxy)ethane, red circle ●) with acetone (1.0 M) in  $\text{CDCl}_3$  solvent at ambient temperature. Inset: details of early conversions of the reactions (0-140 min). The progress of formation reactions of the imine adducts could be readily monitored at the methylene protons on 1,2-bis(2-aminoethoxy)ethane ( $\delta$  3.52 ppm for  $\text{CH}_2\text{NH}_2$ ) and 1,2-bis(2-aminooxyethoxy)ethane ( $\delta$  3.83 ppm for  $\text{CH}_2\text{ONH}_2$ ) and corresponding imine adducts ( $\delta$  3.74 ppm for  $\text{CH}_2\text{N}=\text{C}$ ;  $\delta$  4.17 ppm for  $\text{CH}_2\text{ON}=\text{C}$ ) by  $^1\text{H}$  NMR.

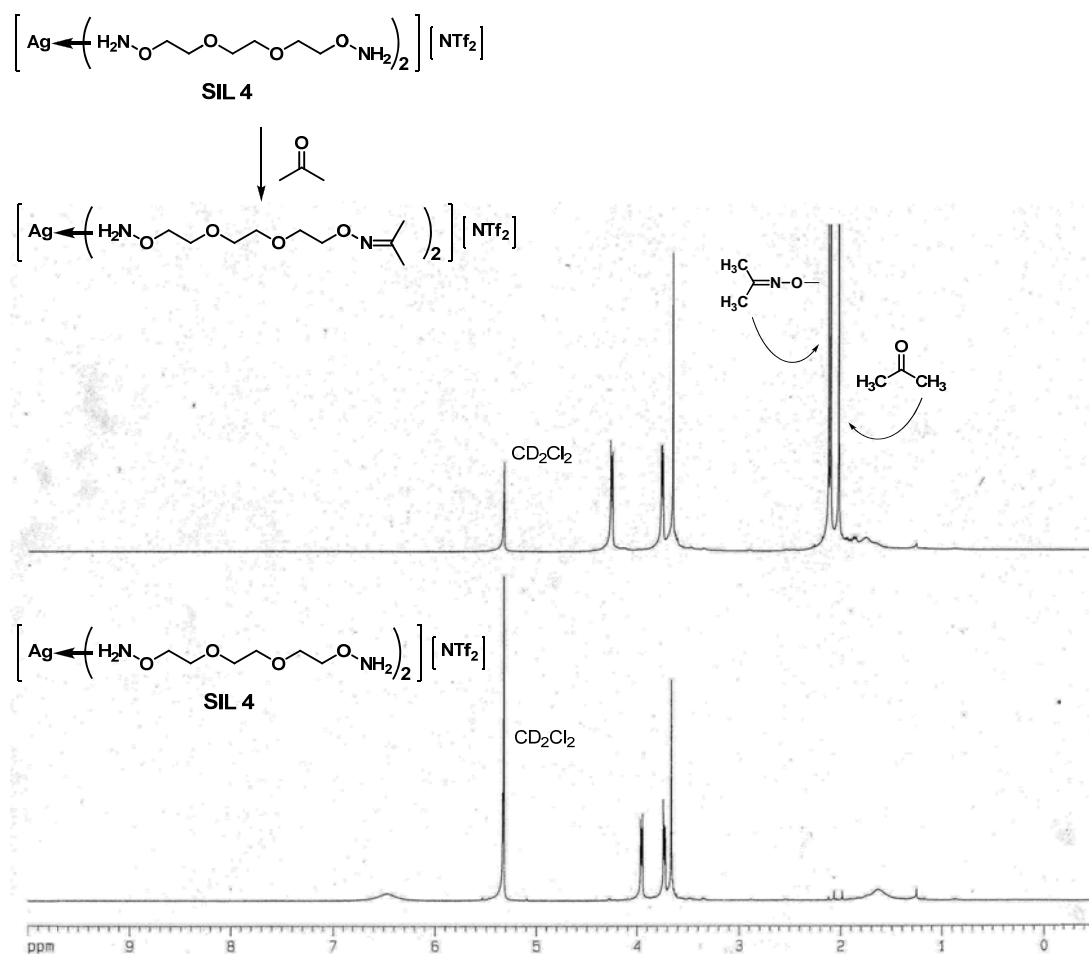

**Fig. S4**  $^1\text{H}$  NMR analysis of the formation of oxime adduct upon silver ionic liquid **SIL 4** reaction with acetone. The measurement was carried out in  $\text{CD}_2\text{Cl}_2$  solvent at ambient temperature.

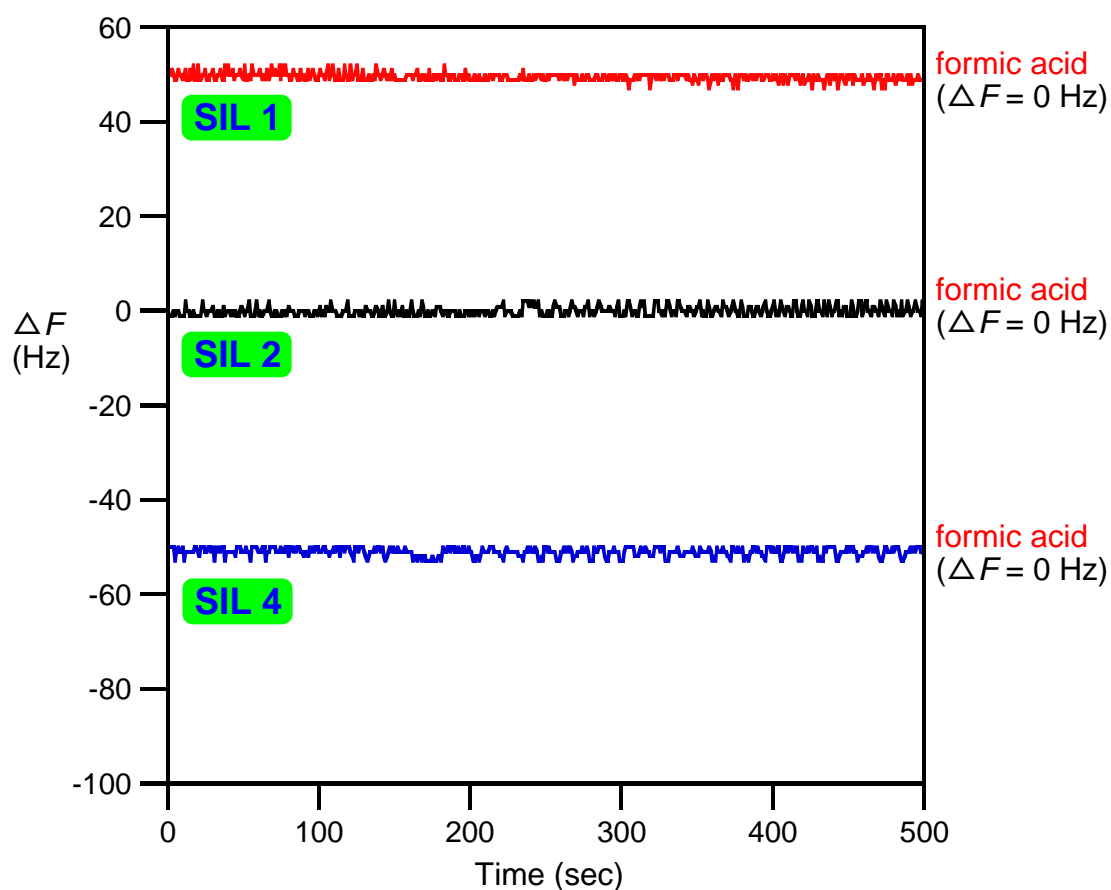

**Fig. S5** Chemoselective detection of formic acid gas (100 ppb) by a multi-channel QCM thin-coated with **SIL 1**, **SIL 2** and **SIL 4**. The QCM sensorgrams with **SIL 1**, **SIL 2** and **SIL 4** for formic acid gas were vertically shifted (50 Hz in between) for clarity. Nitrogen was used as the carrier gas with a flow rate of 3 mL/min, and gaseous samples were injected at 100 s. The resonance frequency drop,  $\Delta F$ , in Hz is the QCM response on the quartz chip surface.

### Synthesis of 1,2-bis(2-aminooxyethoxy)ethane as SIL 4 ligand

To a precooled solution of triethylene glycol (3.0 g, 19.9 mmol) and potassium hydroxide (9.0 g, 160 mmol) in dichloromethane (100 mL) was added slowly neat *p*-toluenesulfonyl chloride (7.6 g, 40 mmol). The resulting solution was stirred at ambient temperature for 8 h and, after the tosylation reaction was completed, washed sequentially with citric acid (10 wt%, 15 mL), sodium bicarbonate (10 wt%, 15 mL), brine (15 mL) and then dried over Na<sub>2</sub>SO<sub>4</sub>. After filtration, the solvent was removed under reduced pressure to afford high purity triethylene glycol di-*p*-tosylate (8.11 g, 88% yield) as white solid.

The obtained triethylene glycol di-*p*-tosylate (1.0 g, 2.18 mmol) was dissolved in DMF (20 mL), and then *N*-hydroxyphthalimide (711 mg, 4.36 mmol) and DBU (0.66 mL, 4.36 mmol) were added. The substitution reaction was carried out at 80 °C for 6 h. After completion of reaction, DMF solvent was removed *in vacuo*, ethyl acetate solvent was added, and the resulting organic phase was washed with sodium bicarbonate (10 wt%), brine and finally dried over Na<sub>2</sub>SO<sub>4</sub>. After filtration and solvent evaporation under reduced pressure, the crude product mixture was purified by flash column chromatography to afford the desired 1,8-diphthalimidooxy-3,6-dioxaoctane (743.2 mg, 72% yield) as white solid.

To a solution of 1,8-diphthalimidooxy-3,6-dioxaoctane (743 mg, 1.76 mmol) in dichloromethane (3 mL) was added hydrazine monohydrate (1.3 mL, 17.6 mmol). The deprotection reaction was readily carried out at room temperature for 1 h. After filtering off the precipitate (2,3-dihydrophthalazine-1,4-dione) and removing the dichloromethane solvent, a yellow viscous liquid was resulted. Diethyl ether solvent was added to this viscous liquid to filter off residual 2,3-dihydrophthalazine-1,4-dione. The ether solvent was evaporated off under reduced pressure. High vacuum was then applied to remove residual hydrazine, if any, to finally afford the desired yellow liquid product, 1,2-bis(2-aminooxyethoxy)ethane, with high isolated yield (295 mg, 81%).

Yellow liquid;  $^1\text{H}$  NMR (400 MHz,  $\text{CDCl}_3$ )  $\delta$  3.65-3.77 (m,  $\text{NOCCH}_2$ , 4H), 3.67 (s,  $\text{COCH}_2$ , 4H), 3.82-3.92 (m,  $\text{NOCH}_2$ , 4H), 5.29-5.79 (bs,  $\text{NH}_2$ , 4H);  $^{13}\text{C}$  NMR (100 MHz,  $\text{CD}_3\text{OD}$ )  $\delta$  70.6, 71.4, 75.8.

### **Synthesis of silver ionic liquid SIL 1**

To a precooled 1,2-bis(aminoethoxy)ethane (352.3 mg, 2.38 mmol) in 4-mL reaction vessel was delivered slowly by a syringe pump a solution of silver nitrate (201.7 mg, 1.19 mmol) in deionized water (250  $\mu\text{L}$ ) for a time period of 2 h. The reaction mixture was kept in dark to avoid light exposure and stirred at 4  $^\circ\text{C}$  for 2 h and subsequently at room temperature for another 1 h to afford a solution containing silver ionic liquid



nitrate salt.

To the solution of silver ionic liquid nitrate salt was added a solution of lithium bistrifluoromethanesulfonimide (377.7 mg, 1.32 mmol) in water (250  $\mu$ L). This metathesis reaction was allowed to proceed for 2 h at room temperature. The formation of two phases was observed usually within first 30 min. The resulting solution was then added dichloromethane (750  $\mu$ L) for extraction to afford the ionic liquid product. This organic phase was further washed three times with deionized water (500  $\mu$ L each time) to remove any unreactive water miscible diamine ligand and silver nitrate residue. After removal of the solvent under reduced pressure, the desired **SIL 1** product was obtained (537.2 mg, 66% yield) as light yellow liquid.

Light yellow liquid;  $^1\text{H}$  NMR (400 MHz,  $\text{CDCl}_3$ )  $\delta$  2.57 (s,  $\text{NH}_2$ , 8H), 3.06 (t,  $J = 4.6$  Hz,  $\text{NCH}_2$ , 8H)  $\delta$  3.58 (t,  $J = 4.6$  Hz,  $\text{OCH}_2\text{CN}$ , 8H)  $\delta$  3.66 (s,  $\text{COCH}_2$ , 8H);  $^{13}\text{C}$  NMR (100 MHz,  $\text{CDCl}_3$ )  $\delta$  42.3, 69.5, 69.6, 119.7 (q,  $J_{\text{CF}} = 319$  Hz,  $\text{CF}_3$ ); ESI-HRMS  $m/z$   $[\text{M}]^+$  calcd for  $\text{C}_{12}\text{H}_{32}\text{N}_4\text{O}_4\text{Ag}$  403.1474, found 403.1470.

### **Synthesis of silver ionic liquid SIL 2**

To a precooled 2-methoxyethylamine (178.1 mg, 2.37 mmol) in 4-mL reaction vessel was added slowly a solution of silver nitrate (200.2 mg, 1.18 mmol) in deionized

water (250  $\mu\text{L}$ ). The reaction mixture was kept in dark to avoid light exposure and stirred at 4  $^{\circ}\text{C}$  for 2 h and subsequently at room temperature for another 1 h to afford a solution containing silver ionic liquid nitrate salt.

To the solution of silver ionic liquid nitrate salt was added a solution of lithium bistrifluoromethanesulfonimide (372.4 mg, 1.30 mmol) in water (250  $\mu\text{L}$ ). Since two phases was formed almost instantaneously, this metathesis reaction was vigorously stirred for 6 h at room temperature. The resulting solution was then added dichloromethane (750  $\mu\text{L}$ ) for extraction to afford the ionic liquid product. This organic phase was further washed three times with deionized water (500  $\mu\text{L}$  each time) to remove any unreactive water miscible amine ligand and silver nitrate residue. After removal of the solvent under reduced pressure, the desired **SIL 2** product was obtained (598.6 mg, 94% yield) as colorless liquid.

Colorless liquid;  $^1\text{H}$  NMR (400 MHz,  $\text{CDCl}_3$ )  $\delta$  2.53-2.98 (bs,  $\text{NH}_2$ , 4H), 3.05 (t,  $J = 4.8$  Hz,  $\text{CH}_2\text{N}$ , 4H), 3.39 (s,  $\text{CH}_3\text{O}$ , 6H), 3.50 (t,  $J = 4.8$  Hz,  $\text{OCH}_2$ , 4H);  $^{13}\text{C}$  NMR (100 MHz,  $\text{CDCl}_3$ )  $\delta$  43.5, 58.9, 72.1, 119.7 (q,  $J_{\text{CF}} = 319$  Hz,  $\text{CF}_3$ ); ESI-HRMS  $m/z$   $[\text{M}]^+$  calcd for  $\text{C}_6\text{H}_{18}\text{N}_2\text{O}_2\text{Ag}$  257.0419, found 257.0421.

#### **Synthesis of silver ionic liquid SIL 4**

To a precooled 1,2-bis(2-aminooxyethoxy)ethane (215.8 mg, 1.20 mmol) in 4-mL reaction vessel was delivered slowly by a syringe pump a solution of silver nitrate (100.7 mg, 0.59 mmol) in deionized water (125  $\mu$ L) for a time period of 2 h. The reaction mixture was kept in dark to avoid light exposure and stirred at 4  $^{\circ}$ C for 2 h and subsequently at room temperature for another 1 h to afford a solution containing silver ionic liquid nitrate salt.

To the solution of silver ionic liquid nitrate salt was added a solution of lithium bistrifluoromethanesulfonimide (187.1 mg, 0.65 mmol) in water (125  $\mu$ L). This metathesis reaction was allowed to proceed for 2 h at room temperature. The formation of two phases was observed usually within first 30 min. The resulting solution was then added dichloromethane (750  $\mu$ L) for extraction to afford the ionic liquid product. This organic phase was further washed three times with deionized water (500  $\mu$ L each time) to remove any unreactive water miscible diamine ligand and silver nitrate residue. After removal of the solvent under reduced pressure, the desired **SIL 4** product was obtained (346.3 mg, 78% yield) as bright yellow liquid.

$^1\text{H}$  NMR (400 MHz,  $\text{CD}_2\text{Cl}_2$ )  $\delta$  3.66 (s,  $\text{COCH}_2$ , 8H), 3.73 (t,  $J = 4.0$  Hz,  $\text{NOCCH}_2$ , 8H), 3.96 (t,  $J = 4.0$  Hz,  $\text{NOCH}_2$ , 8H), 6.11-6.89 (bs,  $\text{NH}_2$ , 8H);  $^{13}\text{C}$  NMR (100 MHz,  $\text{CD}_2\text{Cl}_2$ )  $\delta$  69.6, 70.4, 75.5, 119.4 (q,  $J_{\text{CF}} = 319$  Hz,  $\text{CF}_3$ ); ESI-HRMS  $m/z$   $[\text{M}]^+$  calcd

for  $C_{12}H_{32}AgN_4O_8$  467.1271, found 467.1273.

### **QCM measurements**

A 9 MHz QCM prototype device used in this work was composed of an outer metal chassis of ADS (affinity detection system) (ANT Technology Co., Taipei, Taiwan; <http://www.anttech.com.tw/>) and a QCM SB01B Analyzer core unit (Smart Biotechnology, Taipei, Taiwan). This QCM system was operated at room temperature and using nitrogen as carrier gas. The flow rate of the carrier gas was controlled by a commercial flow meter (Supelco Inc.). Organic vapors were obtained by gasifying the chemicals in the sealed glass container (1.25 L). The QCM system employed commercially available 9-MHz AT-cut quartz chips (ANT Technology Co., Taipei, Taiwan) deposited with gold electrodes (area  $11 \text{ mm}^2$ ) on both sides. The gold electrodes on chips were cleaned with HCl (1 N) for 5 min, water for 5 min, and NaOH (5 N) for 5 min twice to remove organic absorbent impurities. Finally, quartz chips were rinsed with methanol thoroughly and dried.

The SIL coating solutions were prepared by dissolving silver ionic liquids in methanol with a volume ratio of 1:300. The freshly prepared coating solutions (1  $\mu\text{L}$ ) were carefully pipetted onto the cleaned bare gold electrodes, at the center of quartz chip.

The SIL coated chips were placed in a heating oven (110 °C) for 30 sec to remove residual methanol. The freshly prepared sensor chips were then mounted inside the gas flow chamber and used nitrogen as carrier gas at a flow rate of 3.0 mL/min. Until a stable baseline was obtained, targeted aldehyde or ketone gases were injected into the chamber.





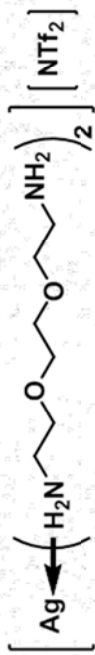

SIL 1

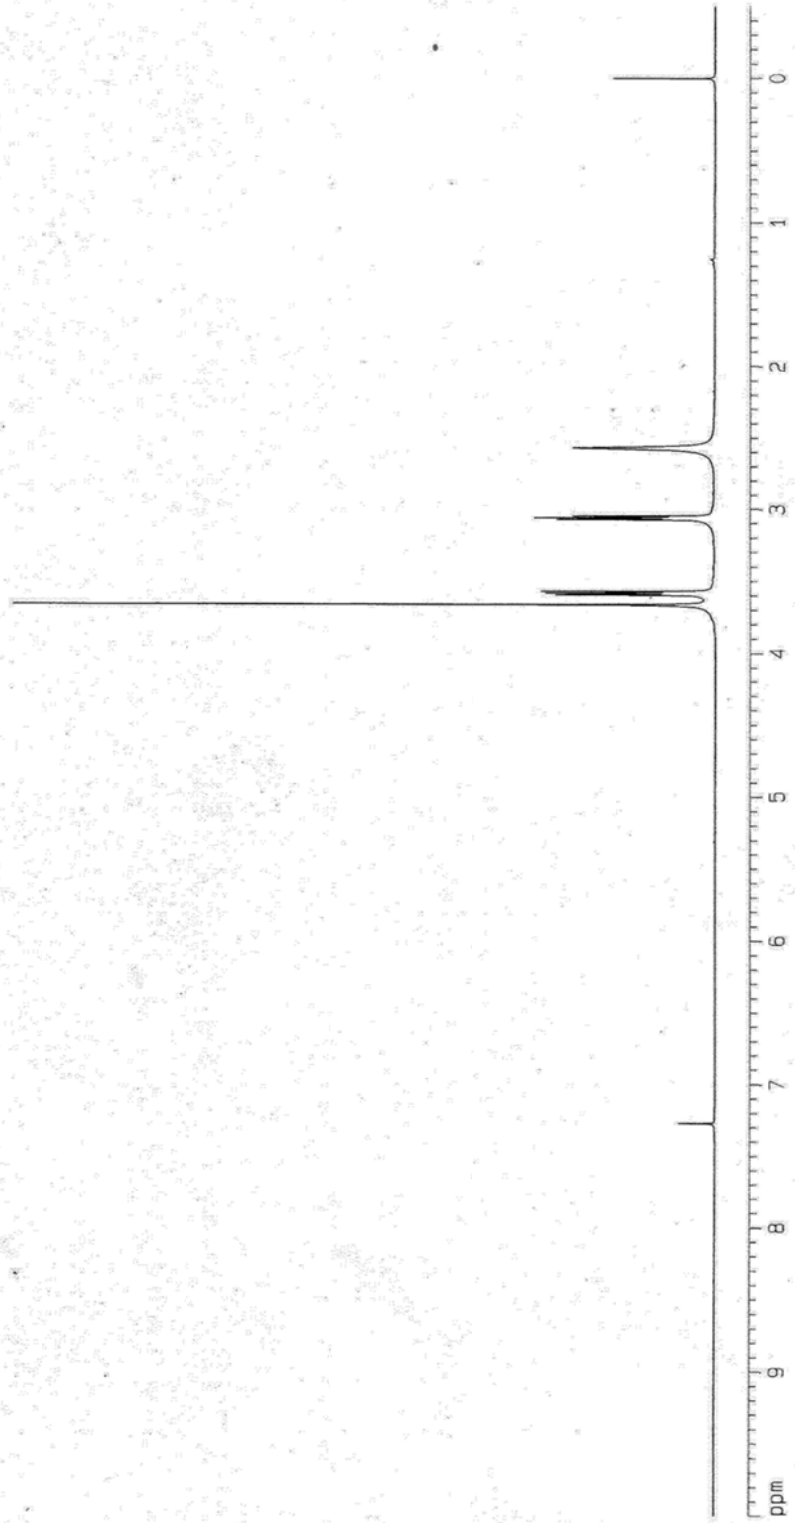



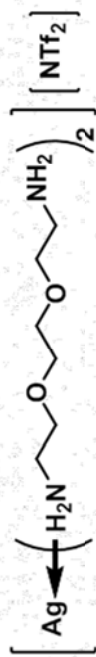

SIL 1

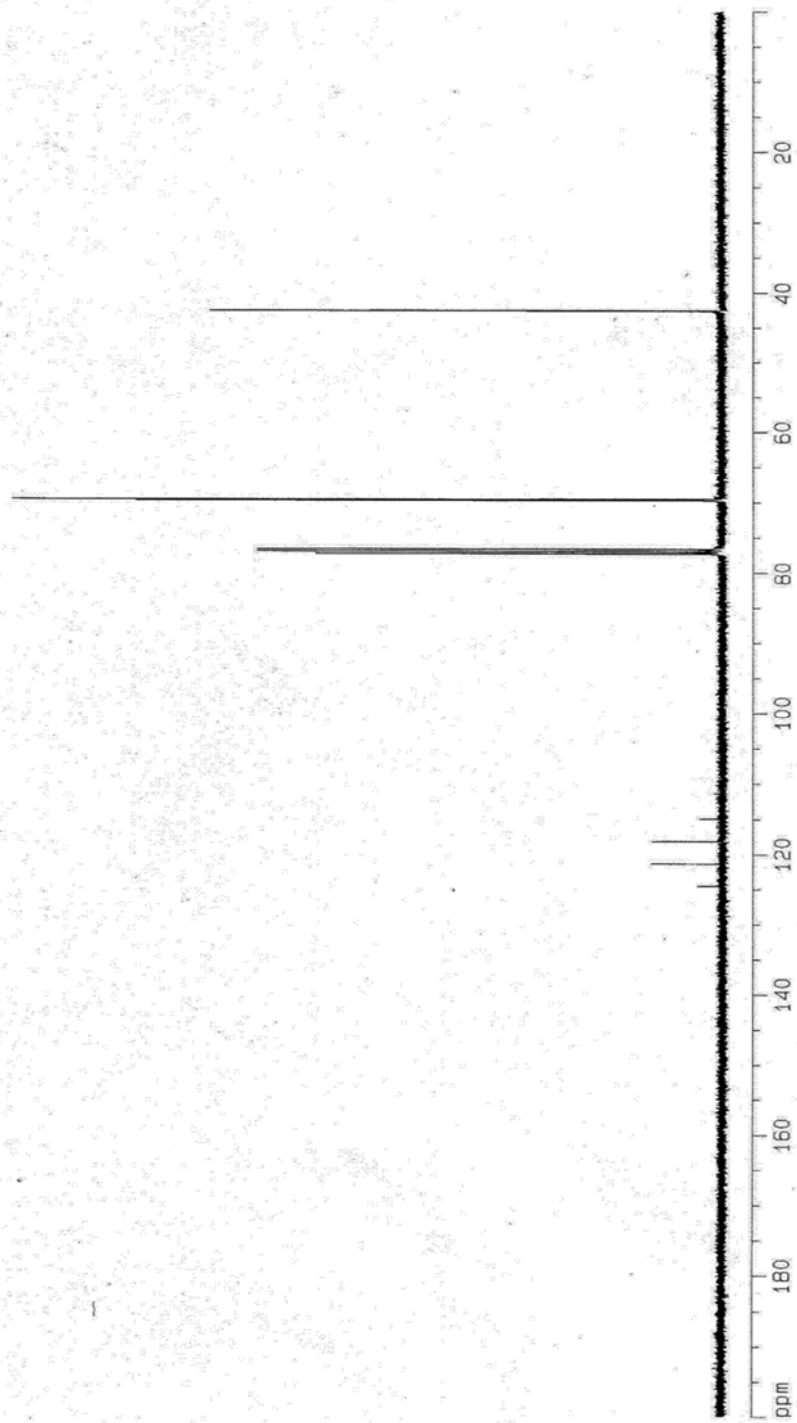

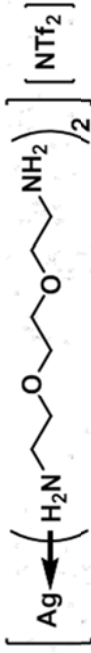

SIL 1

### Elemental Composition Report

#### Single Mass Analysis

Tolerance = 10.0 PPM / DBE: min = -1.5, max = 1000.0  
 Element prediction: Off  
 Number of isotope peaks used for i-FIT = 2

Monoisotopic Mass, Even Electron Ions

7 formula(e) evaluated with 1 results within limits (up to 50 best isotopic matches for each mass)  
 Elements Used:

C: 0-1000 H: 0-1000 N: 4-4 O: 4-4 Ag: 0-1

KE267

13-Jan-2015  
 11:33:06  
 1: TOF MS ES+  
 6.42e+002

1  
 0113\_1 59 (2.623) Cm (59-3x10.000)

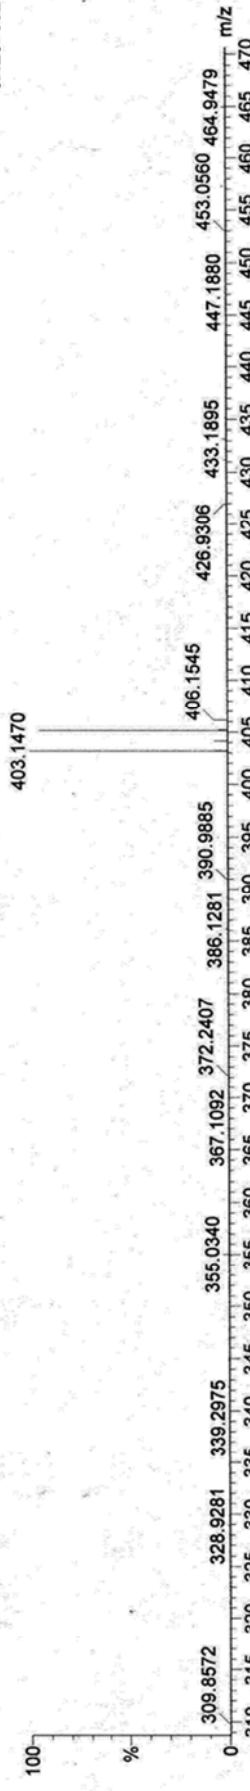

Minimum: -1.5  
 Maximum: 1000.0

| Mass     | Calc. Mass | mDa  | PPM  | DBE  | i-FIT | i-FIT (Norm) | Formula          |
|----------|------------|------|------|------|-------|--------------|------------------|
| 403.1470 | 403.1475   | -0.5 | -1.2 | -1.5 | 23.3  | 0.0          | C12 H32 N4 O4 Ag |

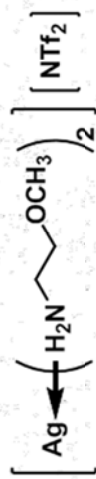

SIL 2

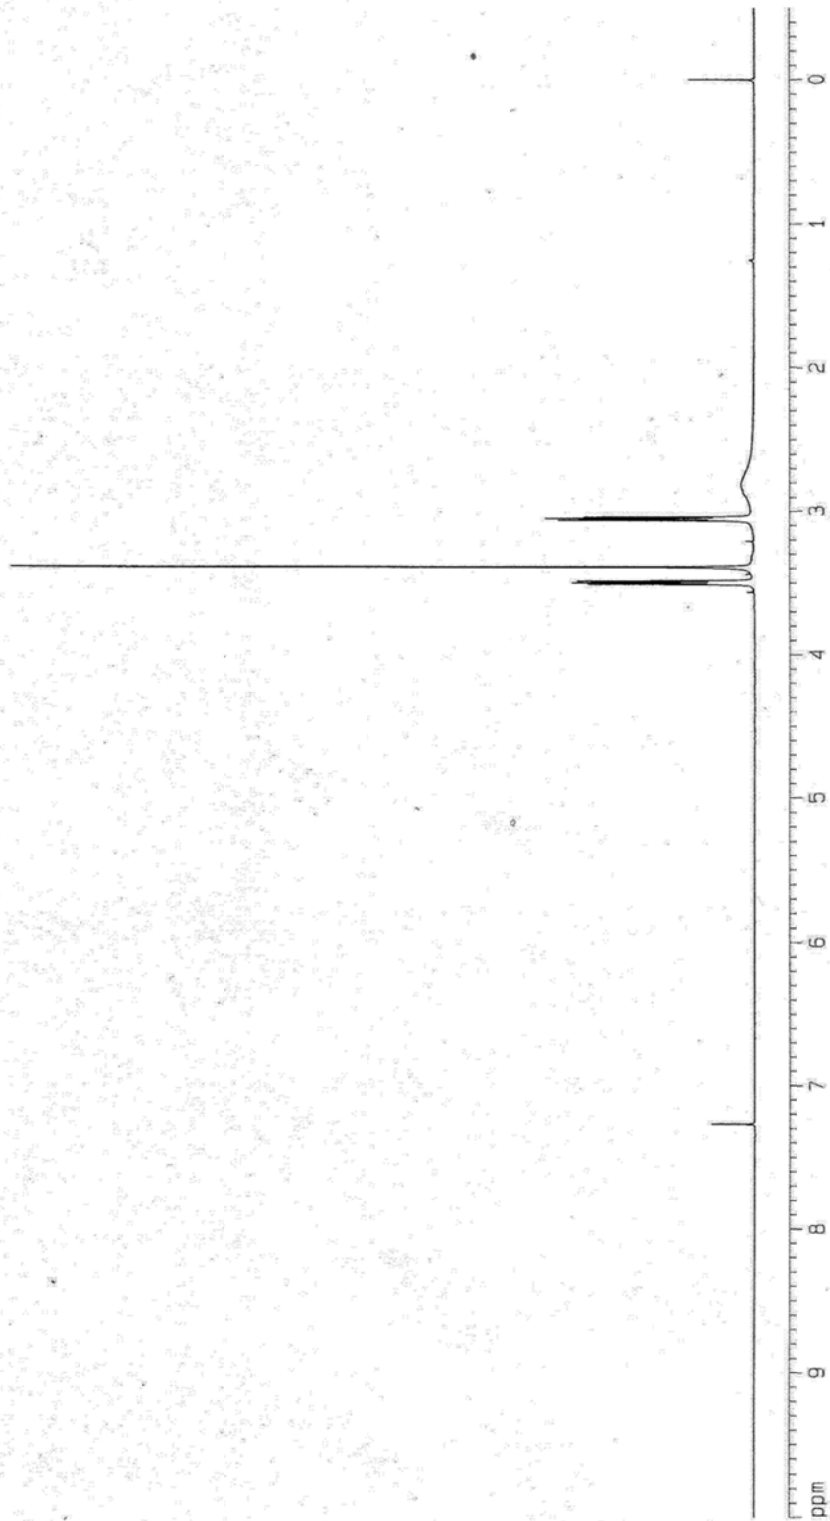

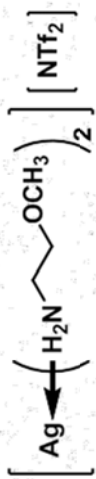

SIL 2

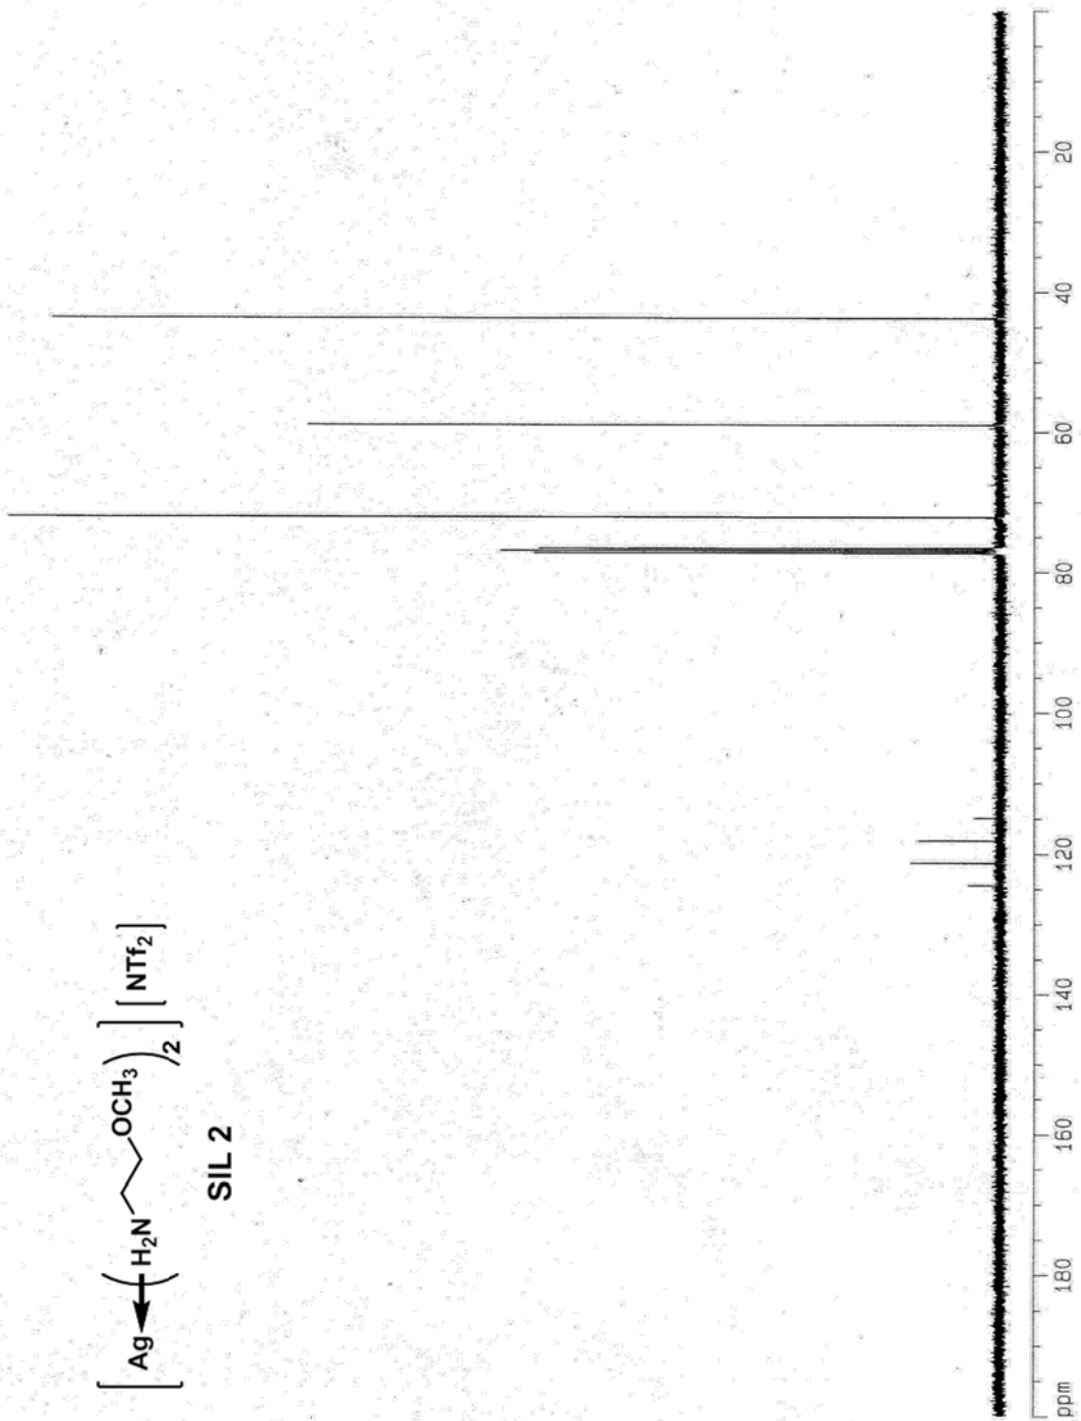

**Elemental Composition Report**

**Single Mass Analysis**

Tolerance = 10.0 PPM / DBE: min = -1.5, max = 1000.0  
 Element prediction: Off  
 Number of isotope peaks used for i-FIT = 2

Monoisotopic Mass, Even Electron Ions  
 5 formula(e) evaluated with 1 results within limits (up to 50 best isotopic matches for each mass)

Elements Used:  
 C: 0-1000 H: 0-1000 N: 2-2 O: 2-2 Ag: 0-1

KE267

13-Jan-2015  
 11:38:54  
 1: TOF MS ES+  
 7.81e+004

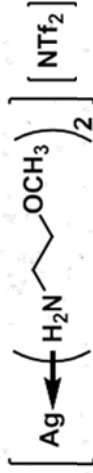

SIL 2

2  
 0113\_2\_17 (0.768)

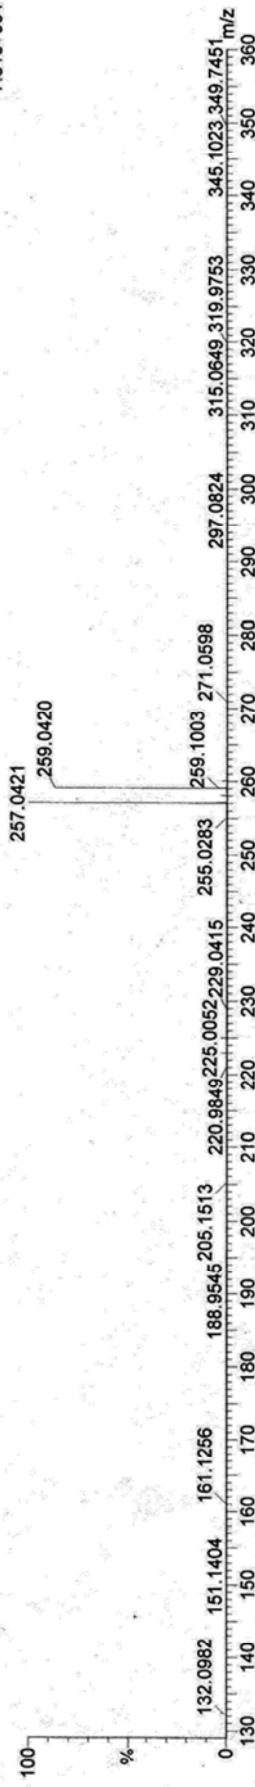

Minimum: -1.5  
 Maximum: 1000.0

| Mass     | Calc. Mass | mDa | PPM | DBE  | i-FIT | i-FIT (Norm) | Formula         |
|----------|------------|-----|-----|------|-------|--------------|-----------------|
| 257.0421 | 257.0419   | 0.2 | 0.8 | -1.5 | 40.4  | 0.0          | C6 H18 N2 O2 Ag |

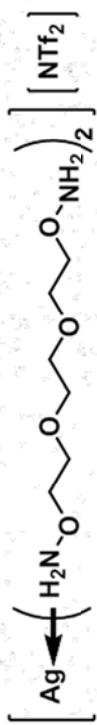

SIL 4

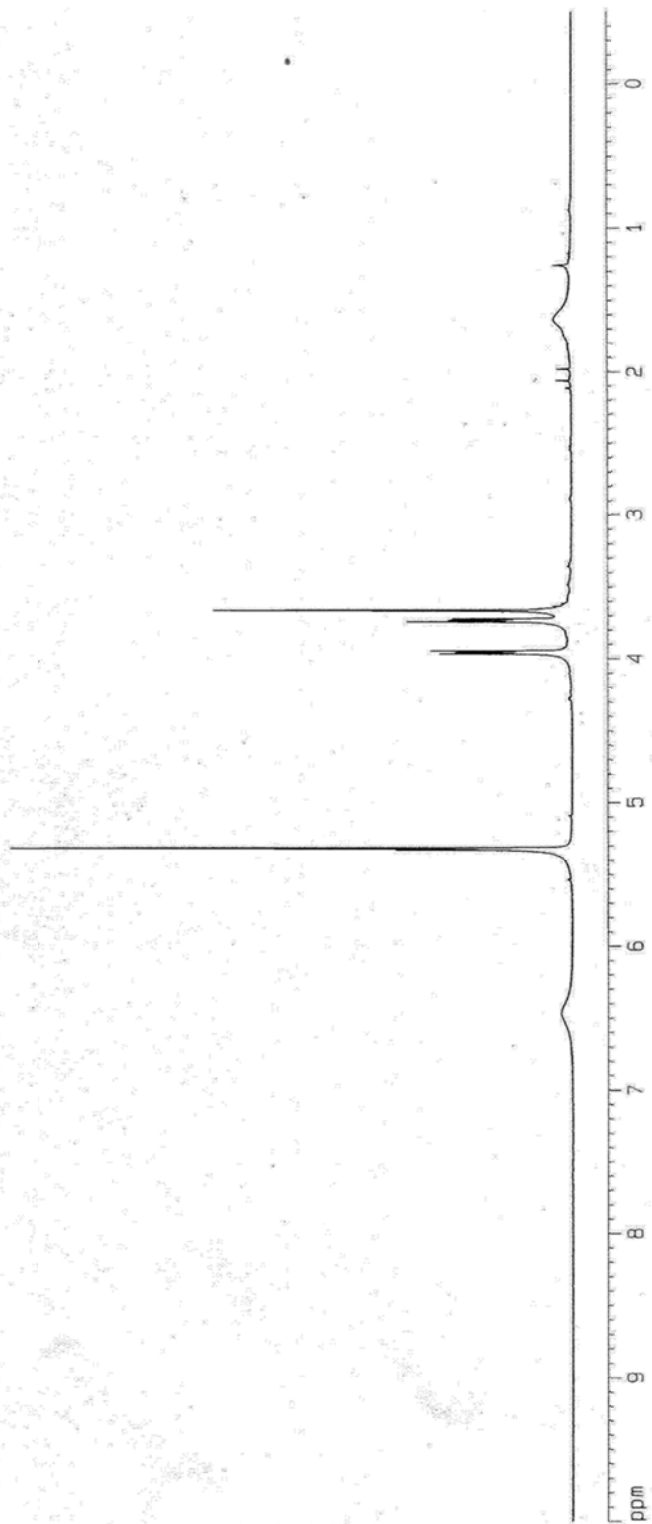

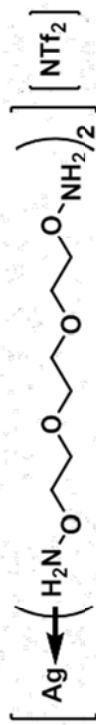

SIL 4

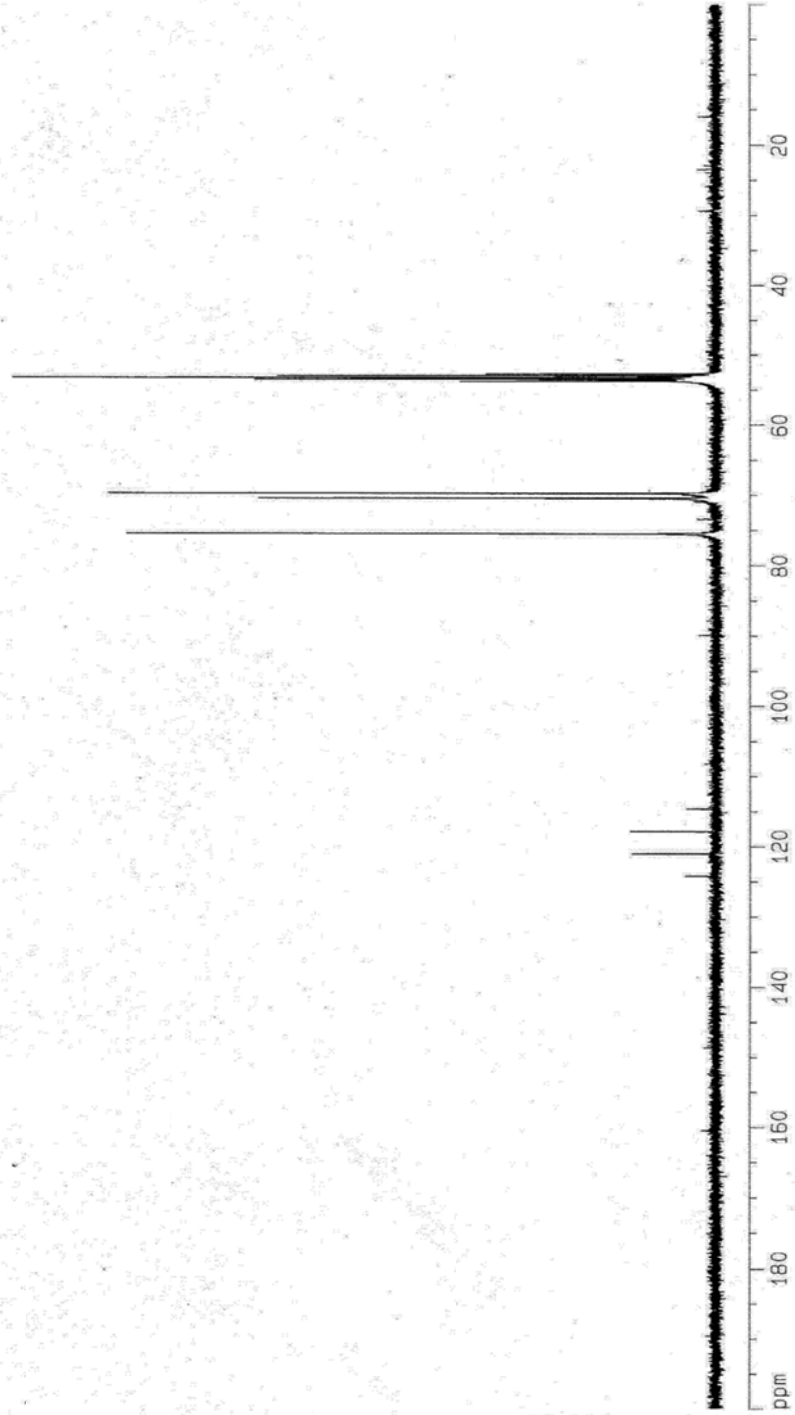

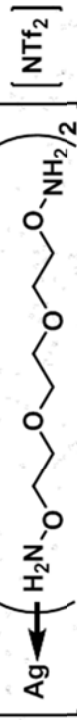

SIL 4

**Elemental Composition Report**

**Single Mass Analysis**

Tolerance = 100.0 PPM / DBE: min = -1.5, max = 1000.0  
 Element prediction: Off  
 Number of isotope peaks used for i-FIT = 2

Monoisotopic Mass, Even Electron Ions  
 3 formula(e) evaluated with 1 results within limits (up to 50 best isotopic matches for each mass)

Elements Used:  
 C: 0-1000 H: 0-1000 N: 4-4 O: 8-8 Ag: 1-1

2

0423\_2\_2\_102 (1.870) Cm (84:102-1x5.000)

KE267 M<sup>+</sup>

23-Apr-2015  
 11:54:47  
 Z: TOF MS AP+  
 1.81e+003

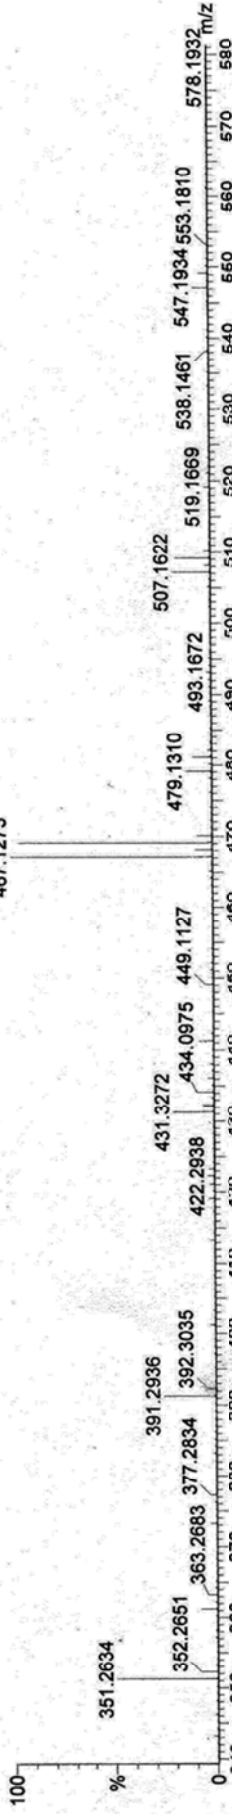

Minimum: -1.5  
 Maximum: 1000.0

| Mass     | Calc. Mass | mDa | PPM | DBE  | i-FIT | i-FIT (Norm) | Formula          |
|----------|------------|-----|-----|------|-------|--------------|------------------|
| 467.1273 | 467.1271   | 0.2 | 0.4 | -1.5 | 55.8  | 0.0          | C12 H32 N4 O8 Ag |
